# Supplementary material for: Prospective affirmative therapeutics of cannabidiol oil mitigates doxorubicin-induced abnormalities in kidney function, inflammation, and renal tissue changes
Source: Springer Nature journal article supplement (doi:10.1007/s00210-023-02836-4), 2023-11-16

# Report on PCR results

21/12/2022

Settings of analysis: method: Threshold (Ct) (BFA), cr=9, vt=10, tp=30, tv=5

Date: 21 2022, 15:37:14  
 Protocol number: 0  
 Operator: Guest  
 Run file: Last\_RUN.r48  
 Comment:

Test: **SYPERGREEN**

Amplification program: **SYPERGREEN (20µl)**

- 1. 94.0 °C - :02:00
  - 2. 94.0 °C - :00:20
  - 60.0 °C - :00:30
  - 72.0 °C - :00:30
- } \*40

## Qualitative analysis

| Number of the well | ID of the tube | Ct, Fam | Ct, Hex | Result |
|--------------------|----------------|---------|---------|--------|
| E2                 | 1 (SYPERGREEN) | 12.0    |         | +      |
| E3                 | 2 (SYPERGREEN) | 14.8    |         | +      |
| E4                 | 3 (SYPERGREEN) | 12.5    |         | +      |
| E5                 | 4 (SYPERGREEN) | 15.4    |         | +      |

\* Manual(Threshold) method (B,F,A) Threshold\_FAM = 21.1 Threshold\_HEX = 0.0

## Dependence of FAM channel fluorescence on cycle number

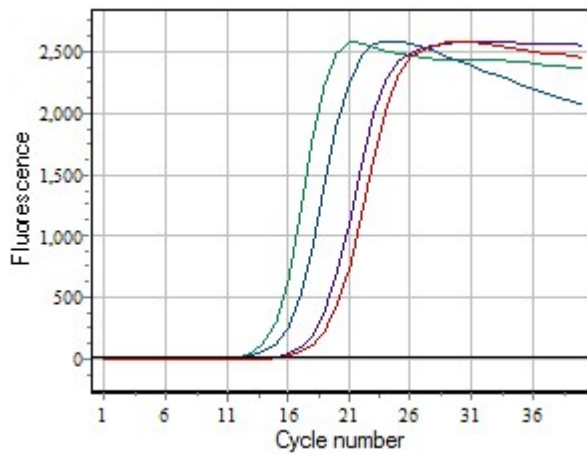

Supplement: MOESM3 [file 210_2023_2836_MOESM3_ESM.pdf]
