# Supplementary material for: Prospective affirmative therapeutics of cannabidiol oil mitigates doxorubicin-induced abnormalities in kidney function, inflammation, and renal tissue changes
Source: Springer Nature journal article supplement (doi:10.1007/s00210-023-02836-4), 2023-11-16

# Report on PCR results

23/12/2022

Settings of analysis: method: Threshold (Ct) (BFA), cr=9, vt=10, tp=0, tv=0

**Date:** 23 2022, 17:03:01  
**Protocol number:** 0  
**Operator:** Guest  
**Run file:** drnahla replicate.r48  
**Comment:**

**Test:** SYPERGREEN

**Amplification program:** SYPERGREEN3 (20µl)

- 1. 94.0 °C - :02:00
- 2. 94.0 °C - :00:20
- 60.0 °C - :00:30  ] \*40
- 72.0 °C - :00:30
- 3. 35.0 °C - :00:15
- 4. 35.0 °C - :00:15  ] \*55 ( 1.00 )

## Qualitative analysis

| Number of the well | ID of the tube | Ct, Fam | Ct, Hex | Result |
|--------------------|----------------|---------|---------|--------|
| F3                 | 1 (SYPERGREEN) | 19.5    |         | +      |
| F4                 | 2 (SYPERGREEN) | 24.4    |         | +      |
| F5                 | 3 (SYPERGREEN) | 23.9    |         | +      |
| F6                 | 4 (SYPERGREEN) |         |         | -      |

\* Manual(Threshold) method (B,F,A) Threshold\_FAM = 19.3 Threshold\_HEX = 0.0

## Dependence of FAM channel fluorescence on cycle number

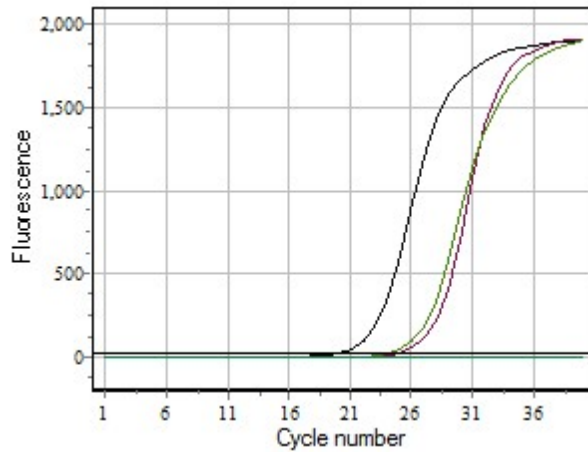

Supplement: MOESM4 [file 210_2023_2836_MOESM4_ESM-1.pdf]
