# Supplementary material for: Prospective affirmative therapeutics of cannabidiol oil mitigates doxorubicin-induced abnormalities in kidney function, inflammation, and renal tissue changes
Source: Springer Nature journal article supplement (doi:10.1007/s00210-023-02836-4), 2023-11-16

# Report on PCR results

23/12/2022

Settings of analysis: method: Curve Shape (Cp) (BF), cr=9, vt=10, tp=30, tv=5

**Date:** 21 2022, 13:34:37  
**Protocol number:** 0  
**Operator:** Guest  
**Run file:** DR NAHLA ABDEL FATAH.r48  
**Comment:**

**Test:** SYPERGREEN

**Amplification program:** SYPERGREEN 2 (20µl)

- 1. 94.0 °C - :02:00
  - 2. 94.0 °C - :00:20
  - 60.0 °C - :00:30
  - 72.0 °C - :00:30
- 
} \*40

## Qualitative analysis

| Number of the well | ID of the tube | Cp, Fam | Cp, Hex | Result |
|--------------------|----------------|---------|---------|--------|
| E2                 | 1 (SYPERGREEN) | 14.9    |         | +      |
| E3                 | 2 (SYPERGREEN) | 18.4    |         | +      |
| E4                 | 3 (SYPERGREEN) | 16.1    |         | +      |
| E5                 | 4 (SYPERGREEN) | 19.2    |         | +      |

## Dependence of FAM channel fluorescence on cycle number

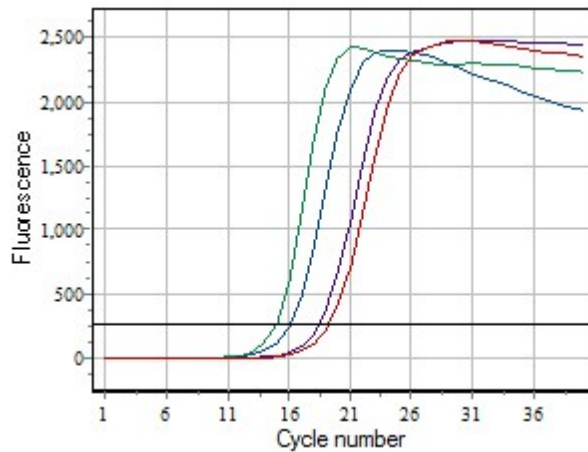

Supplement: MOESM6 [file 210_2023_2836_MOESM6_ESM.pdf]
