# Supplementary material for: Prospective affirmative therapeutics of cannabidiol oil mitigates doxorubicin-induced abnormalities in kidney function, inflammation, and renal tissue changes
Source: Springer Nature journal article supplement (doi:10.1007/s00210-023-02836-4), 2023-11-16

# Report on PCR results

23/12/2022

Settings of analysis: method: Threshold (Ct) (BFA), cr=9, vt=10, tp=0, tv=0

Date: 23 2022, 17:03:01  
Protocol number: 0  
Operator: Guest  
Run file: drnahla replicate.r48  
Comment:

Test: SYPERGREEN

Amplification program: SYPERGREEN3 (20µl)

- 1. 94.0 °C - :02:00
- 2. 94.0 °C - :00:20
- 60.0 °C - :00:30  ] \*40
- 72.0 °C - :00:30
- 3. 35.0 °C - :00:15
- 4. 35.0 °C - :00:15  Δt ] \*55 (1.00)

## Melting Curve

| Number of the well | ID of the tube | Tm Fam | Tm Hex |
|--------------------|----------------|--------|--------|
| F3                 | 1 (SYPERGREEN) | 81.6   |        |

## Dependence of FAM channel fluorescence on temperature

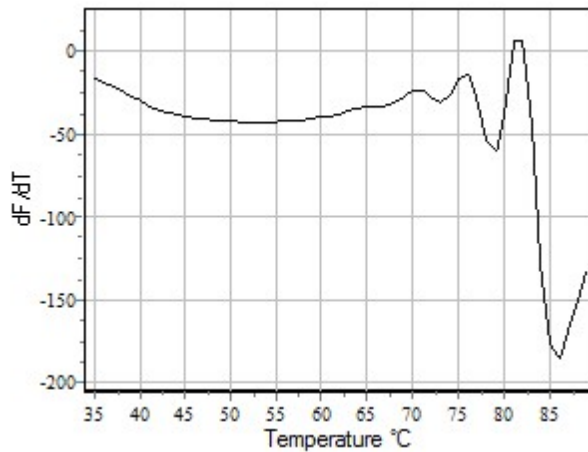

Supplement: MOESM7 [file 210_2023_2836_MOESM7_ESM.pdf]
