# Supplementary material for: Prospective affirmative therapeutics of cannabidiol oil mitigates doxorubicin-induced abnormalities in kidney function, inflammation, and renal tissue changes
Source: Naunyn Schmiedebergs Arch Pharmacol. 2023 Nov 16;397(6):3897–906. doi: 10.1007/s00210-023-02836-4 (PMC11111484; doi:10.1007/s00210-023-02836-4)
Supplement: Supplementary file 5 — (xlsx 10.2 KB) [file 210_2023_2836_MOESM5_ESM.xlsx]

## Sheet: Sheet1
groups	β-actin	Average Ct		IL6R	Average Ct	∆Ct	∆∆Ct	2 ^-∆∆Ct	folds
1	14.7	14.75		30.2	29.2	14.45	4.12	0.06	0.1		control	0.1
1	14.8	14.55		28.2	19.8	5.25	-5.08	33.82	33.82
2	14.3	15.05		19.5	28.75	13.7	3.37	0.069	0.1		treated	33.82
2	14.8	14.7		20.1	24.25	9.55	-0.78	1.72	1.72
3	15.1	15.15		27.5	23.85	8.7	-1.63	3.1	3.1
3	15			30
4	14.9			24.1
4	14.5			24.4		Average∆Ct
5	14.9			23.9		10.33
5	15.4			23.8
